# Supplementary material for: Contribution of 155Gd Mössbauer data to the study of the magnetic interaction in heterodinuclear 3d–Gd (3d = Cu, Ni) coordination complexes
Source: Royal Society of Chemistry journal article supplement (doi:10.1039/c9dt01336a), 2019-01-01
Supplement: c9dt01336a1.pdf [file c9dt01336a1.pdf]

Contribution of  $^{155}\text{Gd}$  Mössbauer Data to the study of  
the magnetic interaction in Heterodinuclear 3d–Gd (3d  
= Cu, Ni) Coordination Complexes

Takanari Ayabe,<sup>a</sup> Jean-Pierre Costes,<sup>b\*</sup> Laure Vendier,<sup>b</sup>  
Andreas Geist,<sup>c</sup> Masuo Takeda<sup>a</sup>, Masashi Takahashi<sup>a\*</sup>

<sup>a</sup>) Department of Chemistry, Faculty of Science, Toho University, Miyama,  
Funabashi, Chiba 274-8510, Japan

<sup>b</sup>) LCC-CNRS, Université de Toulouse, CNRS, Toulouse, France

<sup>c</sup>) Karlsruhe Institute of Technology (KIT), Institute for Nuclear Waste Disposal  
(INE), P. O. Box 3640, 76021 Karlsruhe, Germany

Supplementary Material

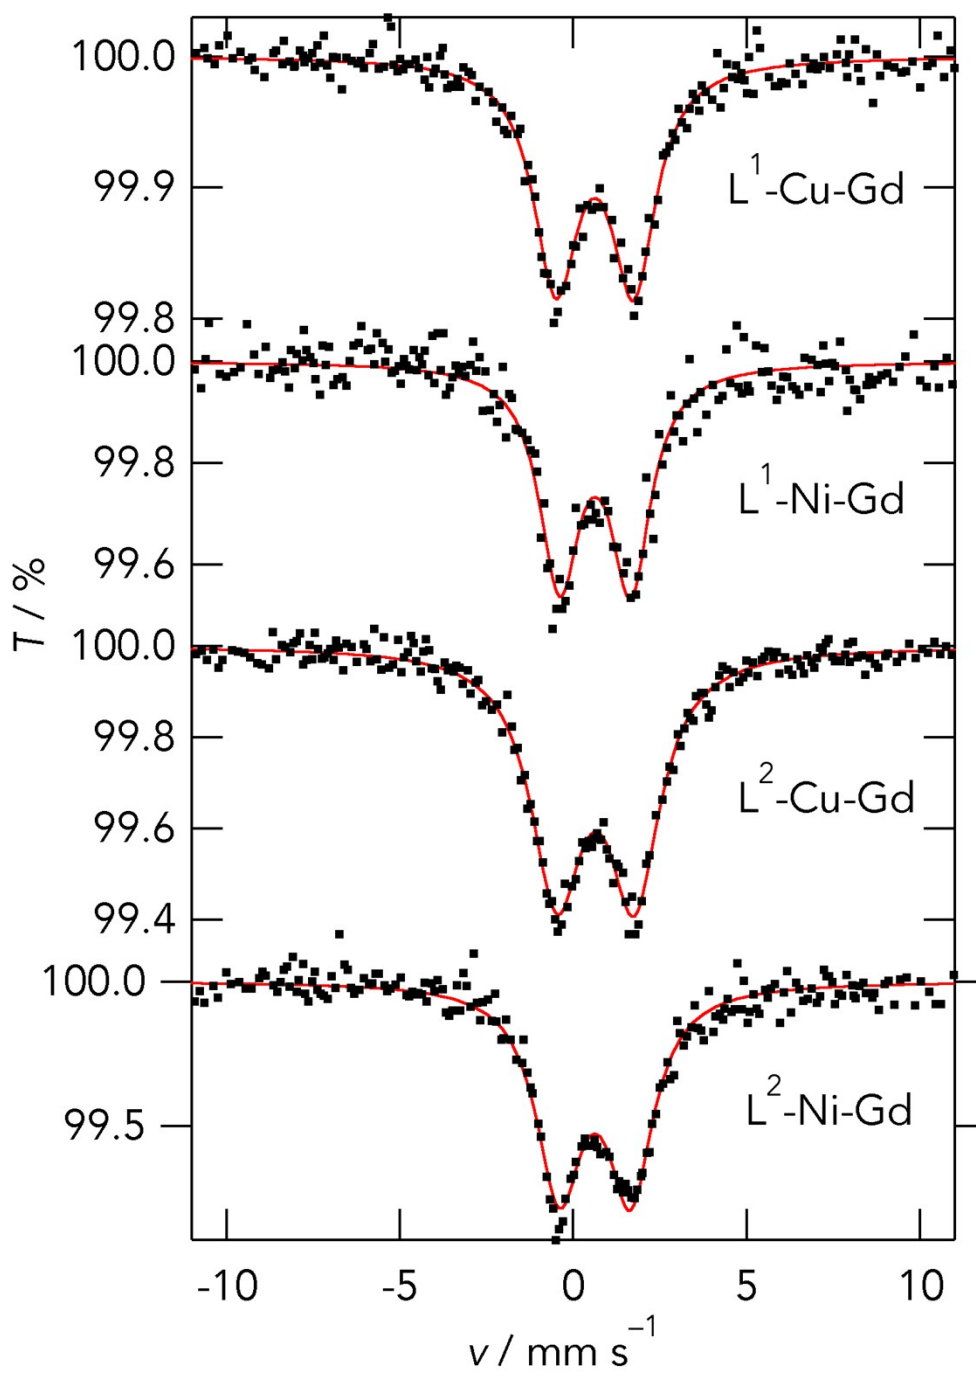

Figure S1.  $^{155}\text{Gd}$  Mössbauer spectra at 12 K for  $L^1\text{Cu}(\text{OCMe}_2)\text{Gd}(\text{NO}_3)_3$  ( $L^1\text{-Cu-Gd}$ ),  $L^1\text{NiGd}(\text{NO}_3)_3 \cdot \text{OCMe}_2$  ( $L^1\text{-Ni-Gd}$ ),  $L^2\text{Cu}(\text{OCMe}_2)\text{Gd}(\text{NO}_3)_3$  ( $L^2\text{-Cu-Gd}$ ), and  $L^2\text{Ni}(\text{H}_2\text{O})_2\text{Gd}(\text{NO}_3)_3$  ( $L^2\text{-Ni-Gd}$ ).

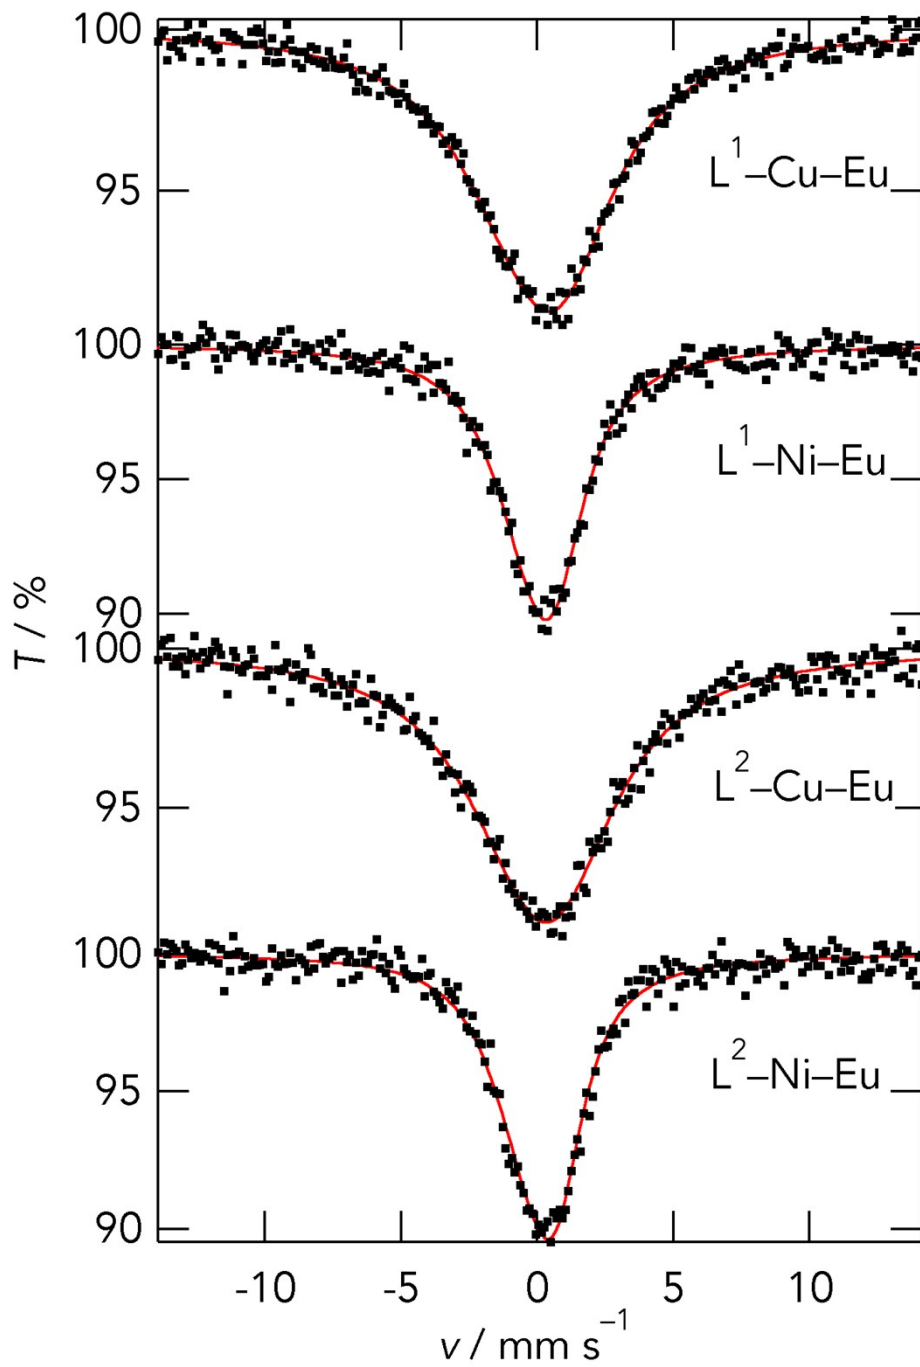

Figure S2.  $^{151}\text{Eu}$  Mössbauer spectra at 78 K for  $\text{L}^1\text{Cu}(\text{OCMe}_2)\text{Eu}(\text{NO}_3)_3$  ( $\text{L}^1\text{-Cu-Eu}$ ),  $\text{L}^1\text{NiEu}(\text{NO}_3)_3 \cdot \text{OCMe}_2$  ( $\text{L}^1\text{-Eu-Gd}$ ),  $\text{L}^2\text{Cu}(\text{OCMe}_2)\text{Eu}(\text{NO}_3)_3$  ( $\text{L}^2\text{-Cu-Eu}$ ), and  $\text{L}^2\text{Ni}(\text{H}_2\text{O})_2\text{Eu}(\text{NO}_3)_3$  ( $\text{L}^2\text{-Ni-Eu}$ ).
